# Supplementary material for: Household wealth, women’s empowerment, and food insecurity in conflict-affected Southeast Myanmar
Source: Research Square preprint supplement (doi:10.21203/rs.3.rs-7322766/v1), 2025-08-18
Supplement: Supplementary file 1 [file c62631af2a8b582b0fba633e.docx]

**Additional File 1**

**Household wealth, women’s empowerment, and food insecurity in conflict-affected Southeast Myanmar**

**Kate Teela Zeichner,Nicholus Tint Zaw, Hnin Hnin Tha Myint, Aye Nyein Ei1, Hay Mar Wai, Tom Traill,Adam Richards**

**Table S1 – Prevalence of household food insecurity, child feeding practices, and maternal diet indicators and their crude and adjusted associations with respondent education, household wealth, and women’s empowerment**

| **Outcome Indicators** | **Parameters** | **Overall** | **Wealth Quintile** | | | | | **Respondent's Education** | | | | **Women Empowerment** | | |
| --- | --- | --- | --- | --- | --- | --- | --- | --- | --- | --- | --- | --- | --- | --- |
| **Poorest** | **Poor** | **Middle** | **Wealthy** | **Wealthiest** | **Illiterate** | **Primary (Under 5th standard)** | **Secondary (under 9th standard)** | **Higher (pass matriculation exam)** | **Low** | **Mod.** | **High** |
|  |
|  |
| **HH Food Insecurity** (FIES raw score >= 4) | **Prevalence** | 23.5% | 27.8% | 17.1% | 21.1% | 10.7% | 2.1% | 33.6% | 16.8% | 26.2% | 9.3% | 21.7% | 24.3% | 25.2% |  |
| **OR** (Crude) |  |  | 0.54** | 0.7 | 0.31* | 0.06*** |  | 0.40*** | 0.7 | 0.20** |  | 1.15 | 1.22 |  |
| **OR** (Adj.) |  |  | 0.79 | 1.14 | 0.32* | 0.08** |  | 0.38*** | 0.63 | 0.17** |  |  |  |  |
| **Exclusive Breastfeeding** (Yes/No) | **Prevalence** | 31.2% | 25.1% | 37.5% | 19.9% | 36.8% | 40.0% | 21.4% | 27.1% | 41.0% | 43.3% | 28.5% | 41.3% | 25.8% |  |
| **OR** (Crude) |  |  | 1.79 | 0.74 | 1.73 | 1.99 |  | 1.34 | 2.52 | 2.70* |  | 1.77 | 0.87 |  |
| **OR** (Adj.) |  |  |  |  |  |  |  | 2.14 | 3.37 | 1.92 |  |  |  |  |
| **Child – Food Group Consumed [0-8]** | **Mean** | 3.7 | 3.4 | 3.8 | 4.2 | 4.5 | 5 | 3.2 | 3.7 | 3.8 | 4.2 | 3.5 | 3.4 | 4 |  |
| **Absolute diff.** (Crude) |  |  | 0.39 | 0.86** | 1.18** | 1.65*** |  | 0.46* | 0.63** | 0.97*** |  | -0.05 | 0.54** |  |
| **Absolute diff.** (Adjusted) |  |  | 0.47* | 0.48 | 0.56 | 1.01 |  | 0.22 | 0.19 | 0.53 |  | 0.03 | 0.33 |  |
| **Child - Minimum Dietary Diversity** (Yes/No) | **Prevalence** | 31.4% | 22.6% | 32.4% | 47.8% | 61.0% | 68.0% | 22.1% | 35.7% | 36.9% | 22.6% | 27.4% | 27.4% | 38.1% |  |
| **OR** (Crude) |  |  | 1.65*** | 3.15*** | 5.37*** | 7.29*** |  | 1.98** | 2.09** | 1.02 |  | 1 | 1.63 |  |
| **OR** (Adj.) |  |  | 1.67 | 1.98 | 2.74** | 4.10** |  | 1.53 | 1.45 | 1.34 |  |  |  |  |
| **Child - Minimum Meal Frequency** (Yes/No) | **Prevalence** | 64.2% | 64.9% | 56.9% | 76.6% | 61.7% | 65.1% | 67.2% | 68.8% | 65.1% | 31.6% | 64.2% | 62.0% | 69.2% |  |
| **OR** (Crude) |  |  | 0.71 | 1.77 | 0.87 | 1.01 |  | 1.07 | 0.89 | 0.22* |  | 0.91 | 1.25 |  |
| **OR** (Adj.) |  |  |  |  |  |  |  | 1.31 | 1.27 | 1.19 |  |  |  |  |
| **Child - Minimum Acceptable Diet** (Yes/No) | **Prevalence** | 25.1% | 19.2% | 22.6% | 42.7% | 45.0% | 54.5% | 17.0% | 27.8% | 31.2% | 17.4% | 22.5% | 20.6% | 31.1% |  |
| **OR** (Crude) |  |  | 1.23 | 3.13** | 3.44*** | 5.03*** |  | 1.87* | 2.21** | 0.99 |  | 1.89 | 1.55 |  |
| **OR** (Adj.) |  |  | 1.38 | 2.39* | 2.67* | 4.08** |  | 1.55 | 1.76 | 1.65 |  |  |  |  |
| **Mother – met Dietary Diversity (Yes/No)** | **Prevalence** | 36.8% | 28.0% | 33.9% | 65.7% | 65.1% | 77.6% | 33.0% | 33.5% | 46.8% | 32.6% | 31.1% | 34.9% | 43.6% |  |
| **OR** (Crude) |  |  | 1.32 | 4.92*** | 4.80*** | 8.88*** |  | 1.01 | 1.79 | 0.97 |  | 1.19 | 1.71* |  |
| **OR** (Adj.) |  |  | 1.29 | 3.19** | 2.00** | 3.40** |  |  |  |  |  | 1.07 | 1.1 |  |
| **Mother - Dietary Diversity Score** [0-10] | **Mean** | 4.4 | 4 | 4.3 | 5.3 | 5.6 | 6.3 | 3.9 | 4.3 | 4.7 | 4.7 | 4.1 | 4.2 | 4.7 |  |
| **Absolute diff.** (Crude) |  |  | 0.35 | 1.35*** | 1.65*** | 2.31*** |  | 0.36 | 0.76** | 0.70* |  | 0.1 | 0.63** |  |
| **Absolute diff.** (Adjusted) |  |  | 0.31 | 0.86** | 0.74** | 1.50** |  | 0.21 | 0.33 | 0.84* |  | 0.21 | 0.31 |  |

*** p<0.1, ** p<0.05, *** p<0.01**

**Table S2 – Prevalence of household food insecurity, child feeding practices, and maternal diet indicators and their crude and adjusted associations with distances to health facilities and markets**

| **Outcome Indicators** | **Parameters** | **Overall** | **Distance to Health Facility** (round trip travel time by hour) | | | | **Distance to Market** (round trip travel time by hour) | | | |
| --- | --- | --- | --- | --- | --- | --- | --- | --- | --- | --- |
|  |
| **Facility in Village** | **≤ 1.5** | **1.6 – 3** | **> 3** | **Market in Village** | **≤ 1.5** | **1.6 – 3** | **> 3** |  |
| **HH Food Insecurity** (FIES score >= 4) | **Prevalence** | 23.50% | 21.20% | 15.0% | 18.6% | 30.4% | 7.7% | 20.1% | 20.7% | 30.8% |  |
| **Odds Ratio** (Crude) |  |  | 0.65 | 0.85 | 1.62 |  | 3.04* | 3.14* | 5.37** |  |
| **Odds Ratio** (Adjusted) |  |  |  |  |  |  | 3.30* | 2.59 | 2.61 |  |
| **Exclusive Breastfeeding** (Yes/No) | **Prevalence** | 31.20% | 36.40% | 41.1% | 14.3% | 24.5% |  |  |  |  |  |
| **Odds Ratio** (Crude) |  |  | 1.22 | 0.29* | 0.57 |  |  |  |  |  |
| **Odds Ratio** (Adjusted) |  |  | 0.96 | 0.33 | 0.51 |  |  |  |  |  |
| **Child – Food Group Consumed**  [0-8] | **Mean** | 3.7 | 3.9 | 4 | 3.1 | 3.3 | 3.7 | 4.4 | 3.4 | 3.2 |  |
| **Coefficient** (Crude) |  |  | 0.1 | -0.78** | -0.62** |  | 0.73 | -0.28 | -0.49 |  |
| **Coefficient** (Adjusted) |  |  | 0.16 | -0.34 | 0.1 |  |  |  |  |  |
| **Child - Minimum Dietary Diversity** (Yes/No) | **Prevalence** | 31.40% | 40.60% | 37.8% | 19.8% | 25.6% | 34.1% | 47.3% | 26.6% | 24.8% |  |
| **Odds Ratio** (Crude) |  |  | 0.89 | 0.36** | 0.50** |  | 1.73 | 0.7 | 0.64 |  |
| **Odds Ratio** (Adjusted) |  |  | 0.9 | 0.7 | 1.04 |  |  |  |  |  |
| **Child - Minimum Meal Frequency** (Yes/No) | **Prevalence** | 64.20% | 59.20% | 74.0% | 77.9% | 65.8% | 80.9% | 58.6% | 72.7% | 63.8% |  |
| **Odds Ratio** (Crude) |  |  | 1.96 | 2.43** | 1.33 |  | 0.33* | 0.63 | 0.42 |  |
| **Odds Ratio** (Adjusted) |  |  | 2.33** | 2.21* | 1.38 |  | 0.35* | 0.63 | 0.52 |  |
| **Child - Minimum Acceptable Diet** (Yes/No) | **Prevalence** | 25.10% | 32.40% | 29.8% | 15.0% | 21.2% | 29.1% | 36.6% | 20.7% | 20.6% |  |
| **Odds Ratio** (Crude) |  |  | 0.89 | 0.37* | 0.56* |  | 1.41 | 0.64 | 0.63 |  |
| **Odds Ratio** (Adjusted) |  |  | 1.02 | 0.64 | 0.94 |  |  |  |  |  |
| **Mother – met Dietary Diversity** (Yes/No) | **Prevalence** | 36.80% | 42.00% | 51.2% | 16.7% | 37.8% | 43.4% | 54.6% | 23.7% | 37.8% |  |
| **Odds Ratio** (Crude) |  |  | 1.45 | 0.28** | 0.84 |  | 1.57 | 0.4 | 0.79 |  |
| **Odds Ratio** (Adjusted) |  |  | 1.32 | 0.45 | 1.54 |  |  |  |  |  |
| **Mother - Dietary Diversity Score** [0-10] | **Prevalence** | 4.4 | 4.6 | 4.6 | 3.6 | 4.3 | 4.5 | 5 | 3.8 | 4.3 |  |
| **Coefficient** (Crude) |  |  | -0.02 | -1.04* | -0.36 |  | 0.51 | -0.64 | -0.16 |  |
| **Coefficient** (  Adjusted) |  |  | -0.03 | -0.33 | 0.29 |  |  |  |  |  |

*** p<0.1, ** p<0.05, *** p<0.01**

**Table S3: Complementary Feeding Indicators for Children (6-23 months) by Breastfeeding Status**

|  | Overall | | Breastfeeding | | Non-Breastfeeding | |
| --- | --- | --- | --- | --- | --- | --- |
|  | **N** | **%** | **N** | **%** | **N** | **%** |
|  |  |  |  |  |  |  |
| Minimum Dietary Diversity | 388 | 31.4% | 210 | 42.0% | 178 | 18.4% |
| Minimum Meal Frequency | 388 | 64.2% | 212 | 73.7% | 178 | 50.5% |
| Minimum Acceptable Diet | 388 | 25.1% | 210 | 36.0% | 178 | 11.8% |
|  |  |  |  |  |  |  |

**Table S4: Proportion of Children (6-23 months) and Mothers Consuming Various Food Groups Based on a 24-Hour Recall**

| **Food Group (24 hours recall)** |  |  |  |  |  |
| --- | --- | --- | --- | --- | --- |
| **Children (6-23 months)** | **N** | **%** | **Mothers with Under 2 yrs old Children** | **N** | **%** |
|  |  |  |  |  |  |
| **Grains, roots, tubers and plantains** | 506 | 61.9% | **Grains, roots, and tubers** | 509 | 98.6% |
| **Pulses, nuts and seeds** | 505 | 17.2% | **Pulses** | 509 | 35.5% |
|  |  |  | **Nuts and seeds** | 509 | 9.7% |
| **Dairy products** | 510 | 17.0% | **Dairy** | 509 | 10.5% |
| **Flesh foods** | 506 | 12.4% | **Meat, poultry, and fish** | 509 | 65.6% |
| **Eggs** | 505 | 29.0% | **Eggs** | 509 | 39.4% |
| **Vit A-rich fruits and vegetables** | 506 | 17.1% | **Dark leafy greens and vegetables** | 509 | 72.8% |
|  |  |  | **Other Vit A-rich fruits and vegetables** | 509 | 36.7% |
| **Other fruits and vegetables** | 507 | 5.7% | **Other vegetables** | 509 | 46.5% |
|  |  |  | **Other fruits** | 509 | 20.0% |
|  |  |  |  |  |  |
